# Supplementary material
Source: Springer Nature journal article supplement (https://www.springermedizin.de/resource/supplementary/12879_2013_2983_MOESM2_ESM.pdf/9446836)

**Chronic  
HBV infection  
(% HBsAg  
positive,  
& 95% CI)**

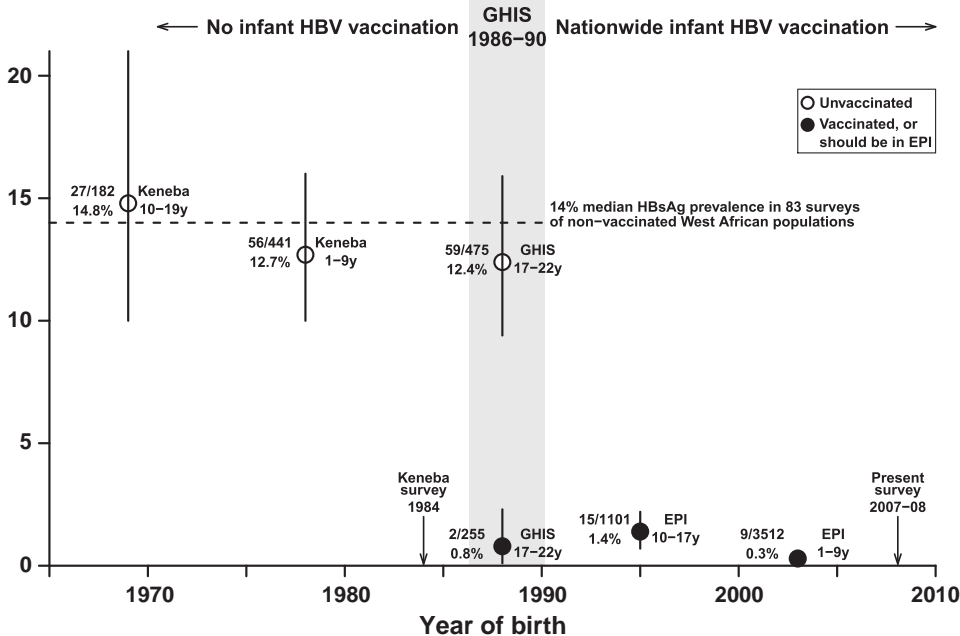

Supplement: MOESM2 [file 9446836]
